# Supplementary material for: Dynamic evolution of mitochondrial genomes in Trebouxiophyceae, including the first completely assembled mtDNA from a lichen-symbiont microalga (Trebouxia sp. TR9)
Source: PubMed Central journal article supplement (PMC6547736; doi:10.1038/s41598-019-44700-7), 2019-06-03
Supplement: 41598_2019_44700_MOESM1_ESM.pdf [file 41598_2019_44700_MOESM1_ESM.pdf]

Supplementary Information: Dynamic evolution of mitochondrial genomes in  
Trebouxiophyceae, including the first completely assembled mtDNA from a lichen-  
symbiont microalga (*Trebouxia* sp. TR9)

Fernando Martínez-Alberola<sup>1</sup>, Eva Barreno<sup>1</sup>, Leonardo M. Casano<sup>2</sup>, Francisco Gasulla<sup>2</sup>, Arántzazu Molins<sup>1</sup>  
and Eva M. del Campo<sup>2</sup>

<sup>1</sup>ICBIBE, Botánica, Facultad de Ciencias Biológicas, Universitat de València, Dr. Moliner 50, 46100-  
Burjassot, Valencia, Spain

<sup>2</sup>Department of Life Sciences, University of Alcalá, 28805, Alcalá de Henares (Madrid), Spain

\*Corresponding author: Eva María del Campo. Email: [eva.campo@uah.es](mailto:eva.campo@uah.es), Tel.: +34 91 885 64 32, Fax: +34  
91 885 5066

| Class                   | Abbreviated name | Organism                              | Accessions |
|-------------------------|------------------|---------------------------------------|------------|
| <b>CHLOROPHYTA</b>      |                  |                                       |            |
| <b>Prasinophyceae</b>   | BPR              | <i>Bathycoccus prasinos</i>           | NC023273   |
|                         | MCO              | <i>Micromonas</i> sp. RCC299          | NC012643   |
|                         | MON              | <i>Monomastix</i> sp. OKE-1           | NC022797   |
|                         | OTA              | <i>Ostreococcus tauri</i>             | NC008290   |
| <b>Trebouxiophyceae</b> | APR              | <i>Auxenochlorella protothecoides</i> | NC026009   |
|                         | BBR              | <i>Botryococcus braunii</i>           | NC027722   |
|                         | CHE              | <i>Chlorella heliozoae</i>            | KY629615   |
|                         | CSO              | <i>Chlorella sorokiniana</i>          | NC024626   |
|                         | CSP              | <i>Chlorella</i> sp. ArM0029B         | KF554428   |
|                         | CSU              | <i>Coccomyxa</i> sp. C-169            | NC015316   |
|                         | CVA              | <i>Chlorella variabilis</i>           | NC025413   |
|                         | HEL              | <i>Helicosporidium</i> sp.            | NC017841   |
|                         | LIN              | <i>Lobosphaera incisa</i>             | NC027060   |
|                         | MIC              | <i>Micractinium conductrix</i>        | KY629619   |
|                         | PCR*             | <i>Prasiola crispa</i>                | KR017746-7 |
|                         | PWI              | <i>Prototheca wickerhamii</i>         | NC001613   |
|                         | PZO1             | <i>Prototheca zopfii</i> SAG 2021     | MF197534   |
|                         | PZO2             | <i>Prototheca zopfii</i> SAG 2063     | MF197533   |
|                         | TAG*             | <i>Trebouxia aggregata</i>            | EU123944-9 |
|                         | TR9              | <i>Trebouxia</i> sp. TR9              | MH917293   |
|                         | TRE              | <i>Trebouxiophyceae</i> sp. MX-AZ01   | NC018568   |
| <b>Ulvophyceae</b>      | GSA              | <i>Gloeotilopsis sarcinoidea</i>      | KX306822   |
|                         | PAK              | <i>Pseudendoclonium akinetum</i>      | NC005926   |
|                         | UPE              | <i>Ulva pertusa</i>                   | NC035722   |
|                         | UPR              | <i>Ulva prolifera</i>                 | NC028538   |
| <b>Chlorophyceae</b>    | CMO              | <i>Chlamydomonas moewusii</i>         | NC001872   |
|                         | CRE              | <i>Chlamydomonas reinhardtii</i>      | NC001638   |
|                         | GPE              | <i>Gonium pectorale</i>               | NC020437   |
|                         | PST              | <i>Pleodorina starrii</i>             | NC021108   |
|                         | TOB              | <i>Tetrademus obliquus</i>            | NC002254   |
| <b>STREPTOPHYTA</b>     |                  |                                       |            |
|                         | CAT              | <i>Chlorokybus atmophyticus</i>       | NC009630   |
|                         | CVU              | <i>Chara vulgaris</i>                 | NC005255   |
|                         | MVI              | <i>Mesostigma viride</i>              | NC_008240  |

**Table S1.** List of the chlorophytes and streptophytes whose mtDNAs were compared in this study. \*, Incomplete sequences.

| Organism          | RPL10 motif | Annotation               | Positions     | Length (CDS / tRNA) | Intron length | Direction | Upstream gene | Downstream gene  |
|-------------------|-------------|--------------------------|---------------|---------------------|---------------|-----------|---------------|------------------|
| <b>rpl10 gene</b> |             |                          |               |                     |               |           |               |                  |
| BPR               | -           | hypothetical protein CDS | 21616 - 22164 | 549                 | NA            | reverse   | nad10         | trnH (gtg)       |
| OTA               | -           | ORF153 CDS               | 11841 - 12293 | 462                 | NA            | reverse   | nad10         | trnH (gtg)       |
| MCO               | -           | UA                       | 113 - 622     | 510                 | NA            | forward   | nad10         | trnH (gtg)       |
| MON               | +           | orf202b                  | 56108 - 56716 | 609                 | NA            | reverse   | nad10         | trnY (gta)       |
| APR               | +           | hypothetical protein     | 21089 - 21721 | 633                 | NA            | forward   | rps10         | rps3             |
| PWI               | +           | orf174 = ymf45 CDS       | 44191 - 44715 | 525                 | NA            | forward   | rps10         | rps3             |
| HEL               | -           | Orf160b CDS              | 19006 - 19488 | 483                 | NA            | forward   | rps10         | rps3             |
| PZO1              | +           | rpl10                    | 37446 - 37967 | 522                 | NA            | forward   | rps10         | rps3             |
| PZO2              | +           | rpl10                    | 36373 - 36894 | 522                 | NA            | forward   | rps10         | rps3             |
| CHE               | -           | UA                       | 30566 - 31162 | 597                 | NA            | forward   | rps19         | rns              |
| CSO               | -           | orf188                   | 5000 - 5563   | 564                 | NA            | reverse   | rps19         | rns              |
| CSP               | +           | orf180                   | 44706 - 45248 | 543                 | NA            | reverse   | rps19         | rns              |
| MIC               | +           | UA                       | 59296 - 59844 | 549                 | NA            | forward   | rps19         | rns              |
| CVA               | -           | UA                       | 2404 - 3045   | 642                 | NA            | reverse   | rps19         | rns              |
| BBR               | -           | orf203                   | 3996 - 4607   | 612                 | 2598          | forward   | rps19         | trnR (cgt) / rnl |
| CSU               | +           | UA                       | 63474 - 64298 | 825                 | NA            | forward   | rps19         | trnR (cgt) / rnl |
| TRE               | -           | orf012                   | 73225 - 74091 | 867                 | NA            | forward   | rps19         | rnl              |
| TAG*              | +           | rpl10                    | 15155 - 15685 | 531                 | NA            | reverse   | rps19         | rpl5             |
| TR9               | +           | rpl10                    | 7587 - 8147   | 561                 | NA            | forward   | rps19         | rpl5             |
| LIN               | +           | orf27                    | 60413 - 61084 | 672                 | NA            | forward   | rps19         | trnE (ttc)       |
| RCR*              | -           | UA                       | 300 - 1136    | 837                 | NA            | forward   | ?             | nad3             |
| <b>tRNA genes</b> |             |                          |               |                     |               |           |               |                  |
| BBR               | NA          | trnF (gaa) / UA          | 30597 - 32959 | 72                  | 2291          | forward   | trnQ (ttg)    | trnK (ttt)       |
|                   | NA          | trnH (gug) / UA          | 40824 - 44243 | 74                  | 3346          | forward   | trnS (tga)    | trnG (tcc)       |
|                   | NA          | trnW (cca) / UA          | 56454 - 58011 | 73                  | 1485          | forward   | trnC (gca)    | trnE (ttc)       |
| TRE               | NA          | trnG (ucc) / UA          | 67060 - 68774 | 71                  | 1644          | forward   | trnH (gug)    | trnP (ugg)       |
| TAG*              | NA          | trnP (ugg) / UA          | 8283 - 10261  | 74                  | 1905          | reverse   | trnG (ucc)    | atp6             |
| PCR**             | NA          | trnI (gau) / UA          | 22611 - 24434 | 74                  | 1750          | forward   | nad6          | trnP (ugg)       |
|                   | NA          | trnM (cat) / UA          | 14989 - 17084 | 74                  | 2022          | forward   | trnR (ucu)    | nad4             |
|                   | NA          | trnR (ucu) / UA          | 10742 - 14253 | 74                  | 3560          | forward   | rpl6          | trnM (cat)       |

**Table S2.** Unannotated tRNA genes and ORFs identified as the *rpl10* gene in the studied mitochondrial genomes. RPL10 protein motifs were searched with MotifSearch, which is available at <https://www.genome.jp/tools/motif/>. Algal species are arranged according to their appearance in the phylogram of Figure 2. \*GenBank accessions for TAG and PCR (contig 1) are EU123949 and KR017746, respectively. \*\* GenBank accessions for PCR (contig 2) is KR017747. +: presence of RPL10 motif, and -: absence of RPL10 motif. NA: not applicable, UA: unannotated. ?: no available sequence upstream of the gene.

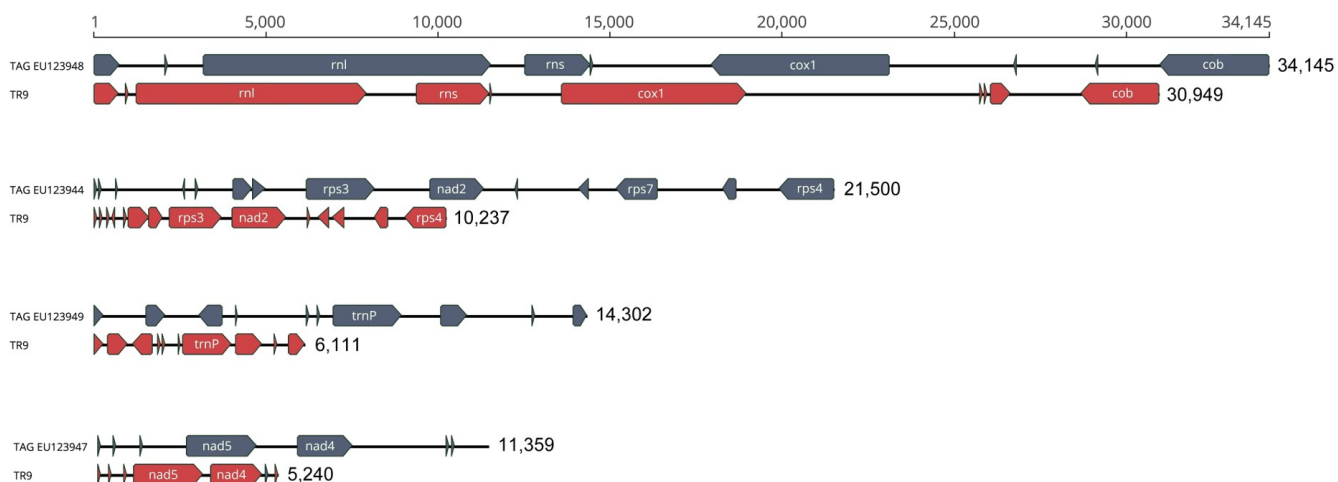

**Figure S1.** Genetic maps of four regions of the mtDNA of *Trebouxia aggregata* (accessions EU123944, EU123947, EU123948 and EU123949) and their counterparts in *Trebouxia* sp. TR9. Coding regions are indicated as blue and garnet arrows for *T. aggregata* (TAG) and *Trebouxia* sp. TR9 (TR9), respectively. Arrowheads indicate transcription directions. Non-coding regions are indicated by a black line.

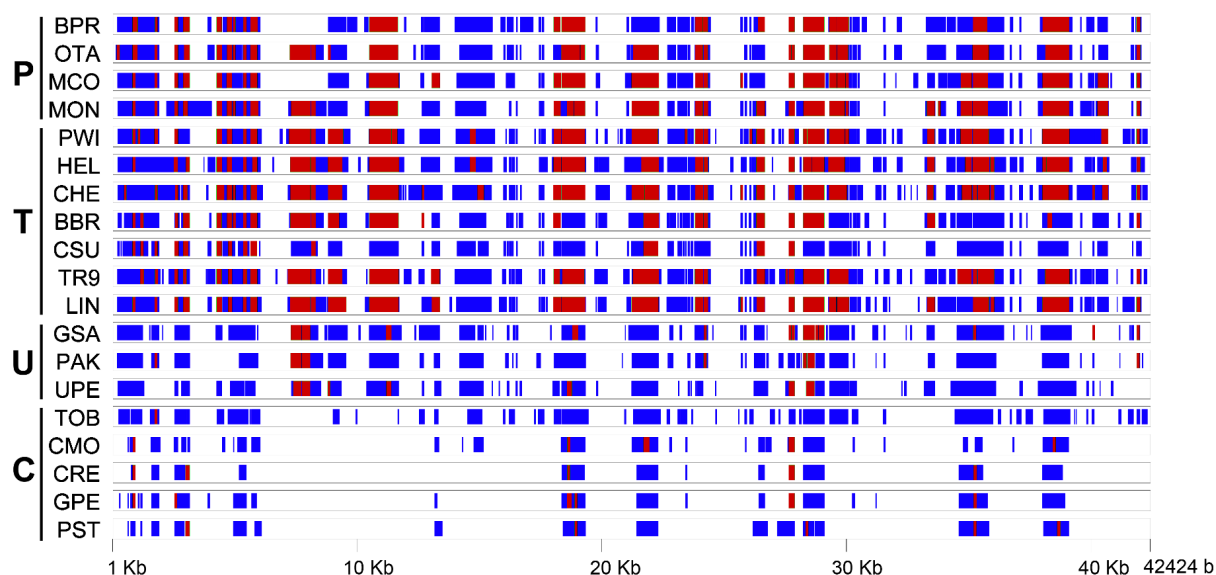

**Figure S2.** Whole-genome alignment of the *Trebouxia* sp. TR9 mitogenome with other chlorophyte mitochondrial genomes obtained with MultiPipMaker<sup>68</sup>, using *Mesostigma viride* as the reference. Sequence identity is shown by red (75–100%), blue (50–75%), and white (<50%). The systematic classification is indicated on the left (P: Prasinophyceae, T: Trebouxiophyceae, U: Ulvophyceae, C: Chlorophyceae).
